# Supplementary material for: The influence of land use and land cover change on landslide susceptibility in the Lower Mekong River Basin
Source: Springer Nature journal article supplement (doi:10.1007/s11069-022-05604-4), 2022-09-14
Supplement: MOESM1 [file 11069_2022_5604_MOESM1_ESM.xlsx]

## Sheet: Sheet1
Logistic Regression Model Coefficients and P-values for Each inventory
Location	Variable	Factor	Coefficient	P-value
Bat Xat, Vietnam	Intercept	Intercept	-42.6761	0.995068
	Land Cover	Agriculture to Forest	2.69383	0.999706
		Agriculture (no change)	-2.88412	0.104386
	Roads	20 - 50 m	-0.0723943	0.999991
		50 - 100 m	21.4987	0.996952
		100 - 200 m	21.222	0.996992
		200 - 1000 m	19.9568	0.997171
		> 1000 m	19.1681	0.997283
	Bulk Density	100-130 cg/cm3	1.69241	0.0318231
	Forest loss		1.99598	0.0388534
	Slope	10 - 20 deg	19.1555	0.996178
		20-25 deg	20.2043	0.995968
		25 - 40 deg	21.8786	0.995634
		40 - 65 deg	21.9502	0.99562
		> 65 deg	2.43175	0.999757
	Aspect	North	-18.3899	0.996099
		East	0.608296	0.36611
		Southeast	1.21368	0.18499
		South	1.19194	0.134972
		Southwest	0.70832	0.372854
		West	-2.06461	0.107276
		Northwest	-18.8385	0.994775
Da Bac, Vietnam	Intercept	Intercept	-2.8398	0.0913473
	Land Cover Change	Urban to Forest	-13.722	0.983475
		Forest (no change)	-0.610658	0.560061
		Forest to Agriculture	-13.0638	0.987682
		Agriculture to Forest	-14.0793	0.980072
		Agriculture (no change)	-1.28757	0.323704
	Distance to Road	20 - 50 m	-2.05516	0.0519695
		50 - 100 m	-1.04419	0.28666
		100 - 200 m	-1.30083	0.176624
		200 - 1000 m	-0.650544	0.480935
		> 1000 m	-1.13633	0.219781
	Bulk Density	bulkdensity4	-0.414016	0.676999
	Forest Loss	forestloss1	1.03727	8.68403e-05
	Slope	10 - 20 deg	0.584507	0.194584
		20-25 deg	2.38741	1.23909e-07
		25 - 40 deg	3.55699	3.41449e-16
		40 - 65 deg	4.41571	7.45647e-17
		> 65 deg	-12.3137	0.986117
	Aspect	North	-1.49813	0.0288052
		East	1.85307	3.05225e-07
		Southeast	2.89846	1.18838e-17
		South	3.11742	5.26697e-21
		Southwest	2.47715	2.8994e-13
		West	1.07344	0.00959621
		Northwest	-1.64987	0.0141036
Mu Chang Chai, Vietnam	Intercept	Intercept	-18.458	0.983256
	Land Cover Change	Agriculture to Forest	-15.4644	0.972323
		Agriculture (no change)	1.35093	2.19776e-25
	Distance to Road	20 - 50 m	15.5426	0.985901
		50 - 100 m	15.6545	0.985799
		100 - 200 m	16.0166	0.985471
		200 - 1000 m	16.2967	0.985217
		> 1000 m	15.857	0.985616
	Soil Bulk Density	100-130 cg/cm3	-1.25148	2.27582e-18
	Forest Loss	forest loss = 1	2.4769	4.12727e-14
	Slope	10 - 20 deg	0.607877	0.0202903
		20-25 deg	0.48533	0.0729066
		25 - 40 deg	0.224125	0.393248
		40 - 65 deg	0.401577	0.367117
		> 65 deg	-15.5247	0.991031
	Aspect	North	-1.06728	0.0842476
		East	1.29599	2.73947e-05
		Southeast	2.30336	4.10475e-15
		South	2.07225	4.16113e-13
		Southwest	1.51016	2.61108e-07
		West	0.735352	0.0208291
		Northwest	-0.216575	0.594777
Muong La, Vietnam	Intercept	Intercept	-18.8	0.996524
	Land Cover Change	Urban to Forest	-15.14	0.990577
		Urban to Agriculture	-14.28	0.992234
		Forest to Urban	-15.3	0.994629
		Forest (no change)	2.3	0.0371413
		Forest to Agriculture	-13.78	0.995081
		Agriculture to Urban	-15.06	0.994671
		Agriculture to Forest	2.23	0.0517332
		Agriculture (no change)	1.89	0.0914482
	Distance to Road	20 - 50 m	-33.3	0.993428
		50 - 100 m	-18.2	0.99633
		100 - 200 m	-18.02	0.996365
		200 - 1000 m	-17.38	0.996494
		> 1000 m	-16.96	0.99658
	Soil Bulk Density	60 - 100 cg/cm3	14.48	0.992461
		100-130 cg/cm3	15.18	0.992098
	Forest Loss	forest loss = 1	-0.77	0.0338728
	Slope	10 - 20 deg	0.45	0.344931
		20-25 deg	1.24	0.00769859
		25 - 40 deg	1.33	0.00236292
		40 - 65 deg	1.65	0.000576562
		> 65 deg	-14.7	0.994638
	Aspect	North	-0.15	0.999893
		Northeast	15.7	0.984019
		East	17.56	0.982134
		Southeast	18.45	0.981231
		South	18.56	0.98111
		Southwest	17.61	0.98208
		West	15.96	0.983756
		Northwest	14.63	0.985117
Phu Yen, Vietnam	Intercept	Intercept	-5.52778	1.99462e-05
	Land Cover Change	Urban to Forest	-1.47895	0.0802402
		Forest to Urban	-15.7324	0.97345
		Forest (no change)	0.499076	0.0237436
		Forest to Agriculture	-13.538	0.995498
		Agriculture to Urban	-13.1183	0.991269
		Agriculture to Forest	1.06107	0.0473442
		Agriculture (no change)	1.66184	0.000389448
	Distance to Road	20 - 50 m	1.0977	0.407087
		50 - 100 m	0.688949	0.569129
		100 - 200 m	0.529476	0.655584
		200 - 1000 m	0.435553	0.708808
		> 1000 m	1.09148	0.349302
	Soil Bulk Density	60 - 100 cg/cm3	-1.12915	0.111814
		100-130 cg/cm3	-0.185959	0.639957
	Forest Loss	forest loss = 1	0.566558	0.00681871
	Slope	10 - 20 deg	1.99955	3.01268e-06
		20-25 deg	2.8291	5.04302e-11
		25 - 40 deg	3.70859	1.04846e-18
		40 - 65 deg	4.08798	2.46185e-18
		> 65 deg	-13.6806	0.992512
	Aspect	North	-2.17602	0.00410433
		East	1.31251	1.39671e-06
		Southeast	2.15617	3.47833e-18
		South	2.30075	4.59699e-20
		Southwest	1.64666	4.55142e-10
		West	-0.260342	0.443014
		Northwest	-1.21598	0.00533393
Tram Tau, Vietnam	Intercept	Intercept	-14.2323	0.9756
	Land Cover Change	Forest (no change)	12.0672	0.97931
		Agriculture to Urban	-1.1536	0.998433
		Agriculture to Forest	11.7296	0.979889
		Agriculture (no change)	12.4706	0.978619
	Distance to Road	20 - 50 m	-0.319281	0.811714
		50 - 100 m	-0.346633	0.79229
		100 - 200 m	-0.853474	0.513784
		200 - 1000 m	-0.359782	0.781398
		> 1000 m	-1.19031	0.358614
	Soil Bulk Density	100-130 cg/cm3	-0.705276	2.79381e-08
	Forest Loss	forest loss = 1	0.935478	1.39492e-05
	Slope	10 - 20 deg	1.09892	0.000812966
		20-25 deg	1.70257	2.44099e-07
		25 - 40 deg	2.44742	4.51557e-15
		40 - 65 deg	2.92181	1.72105e-15
		> 65 deg	0.411045	0.731543
	Aspect	North	-2.1974	9.21676e-05
		East	1.23693	2.58821e-07
		Southeast	2.11666	1.31672e-20
		South	2.07504	8.64016e-19
		Southwest	1.35146	1.95274e-08
		West	-0.315896	0.319877
		Northwest	-2.50449	5.27174e-06
Muong Lat, Vietnam	Intercept	Intercept	-21.778	0.982304
	Land Cover Change	Urban to Forest	0.712019	0.999512
		Forest (no change)	16.3263	0.986734
		Forest to Agriculture	3.99405	0.997102
		Agriculture to Forest	16.0087	0.986992
		Agriculture (no change)	14.7863	0.987985
	Distance to Road	20 - 50 m	-0.145049	0.866262
		50 - 100 m	0.17151	0.831762
		100 - 200 m	0.0135784	0.986283
		200 - 1000 m	0.592292	0.436728
		> 1000 m	-0.516365	0.496488
	Soil Bulk Density	100-130 cg/cm3	1.28092	0.165489
	Forest Loss	forest loss = 1	0.919946	3.23407e-08
	Slope	10 - 20 deg	2.07084	0.000110572
		20-25 deg	3.17409	2.76804e-09
		25 - 40 deg	4.09229	7.58189e-15
		40 - 65 deg	4.40892	2.09611e-14
		> 65 deg	-12.7691	0.982568
	Aspect	North	-1.00894	0.000436813
		East	1.01359	1.66305e-07
		Southeast	1.76891	1.92588e-20
		South	1.1919	2.72381e-10
		Southwest	0.676232	0.000491525
		West	-0.315455	0.172593
		Northwest	-0.867353	0.00144707
Nha Trang, Vietnam	Intercept	Intercept	-17.9462	0.994363
	Land Cover Change	Urban to Forest	-1.58116	0.10778
		Urban to Agriculture	-16.6007	0.993747
		Forest to Urban	-17.5024	0.991625
		Forest (no change)	-0.29525	0.491398
		Agriculture to Urban	-0.840944	0.407005
		Agriculture to Forest	-0.951019	0.341133
		Agriculture (no change)	-2.62836	0.04889
	Distance to Road	20 - 50 m	15.6659	0.995079
		50 - 100 m	16.4428	0.994835
		100 - 200 m	15.5077	0.995129
		200 - 1000 m	15.1469	0.995242
		> 1000 m	15.1554	0.99524
	Soil Bulk Density	60 - 100 cg/cm3	-16.5138	0.992181
		100-130 cg/cm3	-0.0247856	0.967456
	Forest Loss	forest loss = 1	0.406104	0.802643
	Slope	10 - 20 deg	2.30449	0.000703552
		20-25 deg	2.99404	8.52394e-06
		25 - 40 deg	4.19388	1.87847e-09
		40 - 65 deg	2.1619	0.14081
	Aspect	North	-0.636661	0.458474
		East	1.07442	0.0753867
		Southeast	0.969299	0.108263
		South	1.5063	0.0303835
		Southwest	0.563116	0.413016
		West	-0.0312951	0.970669
		Northwest	-0.101911	0.920673
Phong Tho, Vietnam	Intercept	Intercept	-17.0061	0.993945
	Land Cover Change	Agriculture to Forest	2.9103	3.07219e-05
		Agriculture (no change)	3.11371	1.15307e-14
	Distance to Road	20 - 50 m	11.7705	0.995809
		50 - 100 m	13.3157	0.995259
		100 - 200 m	12.3601	0.995599
		200 - 1000 m	12.2392	0.995642
		> 1000 m	13.727	0.995113
	Soil Bulk Density	100-130 cg/cm3	-0.297286	0.414847
	Forest Loss	forest loss = 1	4.42011	0.028034
	Slope	10 - 20 deg	-1.10986	0.19686
		20-25 deg	-0.673055	0.434891
		25 - 40 deg	0.920532	0.257534
		40 - 65 deg	1.47275	0.131067
		> 65 deg	-14.5432	0.997067
	Aspect	North	-15.101	0.986306
		East	2.30685	0.00653598
		Southeast	2.76103	0.000167084
		South	1.98383	0.00752089
		Southwest	1.0598	0.155978
		West	0.256251	0.755025
		Northwest	-1.75423	0.170567
Sin Ho, Vietnam	Intercept	Intercept	-19.0006	0.986866
	Land Cover Change	Urban to Forest	0.15369	0.911933
		Urban to Agriculture	-12.8697	0.984103
		Forest to Urban	-14.2931	0.984369
		Forest (no change)	2.11833	0.00920782
		Forest to Agriculture	-0.111333	0.936255
		Agriculture to Urban	-13.5592	0.989238
		Agriculture to Forest	1.55151	0.0946301
		Agriculture (no change)	1.97301	0.0173541
	Distance to Road	20 - 50 m	2.91123	0.0293002
		50 - 100 m	1.6124	0.182173
		100 - 200 m	1.28791	0.282321
		200 - 1000 m	1.36181	0.244112
		> 1000 m	1.23671	0.288863
	Soil Bulk Density	60 - 100 cg/cm3	11.7551	0.991874
		100-130 cg/cm3	11.8565	0.991804
	Forest Loss	forest loss = 1	0.479597	0.308162
	Slope	10 - 20 deg	1.63772	0.00603688
		20-25 deg	1.72468	0.00410829
		25 - 40 deg	2.78517	1.19663e-06
		40 - 65 deg	2.83814	2.81729e-06
		> 65 deg	-14.2414	0.986888
	Aspect	North	-2.46369	0.0229908
		East	1.43717	4.59156e-05
		Southeast	2.45394	1.43616e-12
		South	2.09386	3.68577e-09
		Southwest	1.09416	0.00222706
		West	-0.593326	0.233037
		Northwest	-2.22651	0.00494211
Tam Duong, Vietnam	Intercept	Intercept	-23.5821	0.992178
	Land Cover Change	Forest to Agriculture	-16.828	0.994701
		Agriculture to Forest	-16.7811	0.99422
		Agriculture (no change)	2.09319	5.01279e-06
	Distance to Road	20 - 50 m	18.4196	0.99389
		50 - 100 m	19.3469	0.993583
		100 - 200 m	19.4216	0.993558
		200 - 1000 m	19.0648	0.993677
		> 1000 m	18.7786	0.993771
	Soil Bulk Density	100-130 cg/cm3	0.408606	0.336062
	Forest Loss	forest loss = 1	1.40173	0.255883
	Slope	10 - 20 deg	1.54508	0.120393
		20-25 deg	2.79387	0.00463649
		25 - 40 deg	2.8745	0.00203734
		40 - 65 deg	2.94689	0.00492817
		> 65 deg	-13.5473	0.997122
	Aspect	North	-0.792012	0.547533
		East	-1.85308	0.15567
		Southeast	1.15436	0.156338
		South	1.93058	0.0108659
		Southwest	0.797037	0.301171
		West	-0.334068	0.716613
		Northwest	-0.801159	0.413217
Than Uyen, Vietnam	Intercept	Intercept	-4.21901	0.00397725
	Land Cover Change	Forest to Agriculture	-14.3792	0.98326
		Agriculture to Forest	-1.01297	0.104879
		Agriculture (no change)	0.101135	0.73782
	Distance to Road	20 - 50 m	-1.07753	0.51163
		50 - 100 m	1.05389	0.477828
		100 - 200 m	2.84121	0.0602025
		200 - 1000 m	1.53329	0.220265
		> 1000 m	0.519948	0.67821
	Soil Bulk Density	100-130 cg/cm3	-0.388714	0.189939
	Forest Loss	forest loss = 1	1.83272	0.000391731
	Slope	10 - 20 deg	1.50605	0.0141055
		20-25 deg	1.97713	0.00181903
		25 - 40 deg	2.04863	0.000541151
		40 - 65 deg	2.40615	0.000287672
		> 65 deg	-13.4814	0.987189
	Aspect	North	0.348108	0.624673
		East	1.34253	0.019324
		Southeast	1.74473	0.00231276
		South	2.42145	9.19234e-06
		Southwest	1.53541	0.0037387
		West	1.65399	0.00369447
		Northwest	0.713175	0.260796
Vi Xuyen, Vietnam	Intercept	Intercept	-21.6337	0.99528
	Land Cover Change	Urban to Forest	-0.493817	0.605551
		Forest to Urban	-19.0762	0.996633
		Forest (no change)	-0.397124	0.546771
		Forest to Agriculture	-20.2626	0.995426
		Agriculture to Forest	0.0789224	0.923619
		Agriculture (no change)	-18.5753	0.993956
	Distance to Road	20 - 50 m	-0.339428	0.999964
		50 - 100 m	18.9508	0.995866
		100 - 200 m	16.8374	0.996327
		200 - 1000 m	17.9748	0.996079
		> 1000 m	18.1172	0.996047
	Soil Bulk Density	100-130 cg/cm3	1.88267	0.0100998
	Forest Loss	forest loss = 1	35.7093	0.992022
	Slope	10 - 20 deg	0.958311	0.23263
		20-25 deg	1.81246	0.0304535
		25 - 40 deg	1.76923	0.029314
		40 - 65 deg	-0.241392	0.864323
		> 65 deg	1.25188	0.999855
	Aspect	North	-17.5452	0.99523
		East	0.740315	0.173734
		Southeast	1.51627	0.00357813
		South	1.54908	0.00992974
		Southwest	0.152319	0.802894
		West	-17.5479	0.993821
		Northwest	-17.1566	0.99359
Falam, Myanmar	Intercept	Intercept	-4.06805	0.00267477
	Land Cover Change	Urban to Forest	-9.7631	0.985452
		Forest to Urban	-9.10932	0.98038
		Forest (no change)	2.21855	6.71405e-06
		Forest to Agriculture	-0.882131	0.4389
		Agriculture to Urban	-10.5788	0.971158
		Agriculture to Forest	2.15795	3.39032e-05
		Agriculture (no change)	0.83159	0.0960978
	Distance to Road	20 - 50 m	0.686842	0.450508
		50 - 100 m	1.22792	0.166775
		100 - 200 m	0.676243	0.438514
		200 - 1000 m	0.755082	0.380485
		> 1000 m	0.292336	0.733716
	Soil Bulk Density	60 - 100 cg/cm3	-0.884714	0.360668
		100-130 cg/cm3	-1.32473	0.170938
	Forest Loss	forest loss = 1	-0.768995	2.31972e-09
	Slope	10 - 20 deg	1.85995	1.26348e-15
		20-25 deg	2.35493	2.95305e-24
		25 - 40 deg	2.67584	5.15318e-32
		40 - 65 deg	2.72236	2.30254e-27
		> 65 deg	-11.644	0.968797
	Aspect	North	-0.643866	9.32403e-06
		East	0.727447	1.69418e-12
		Southeast	1.05787	3.17595e-26
		South	0.834734	1.20485e-15
		Southwest	0.523823	1.15856e-06
		West	-0.136998	0.237052
		Northwest	-0.347719	0.00463913
Hakha, Myanmar	Intercept	Intercept	-18.4351	0.972083
	Land Cover Change	Forest to Urban	-13.0459	0.983676
		Forest (no change)	2.36003	0.0226165
		Forest to Agriculture	0.424332	0.789833
		Agriculture to Urban	-12.3662	0.984519
		Agriculture to Forest	2.41769	0.0226789
		Agriculture (no change)	1.44055	0.166
	Distance to Road	20 - 50 m	14.2522	0.978416
		100 - 200 m	14.3809	0.978221
		200 - 1000 m	14.6733	0.977778
		> 1000 m	14.358	0.978255
	Soil Bulk Density	100-130 cg/cm3	0.193453	0.0324293
	Forest Loss	forest loss = 1	-0.119863	0.473087
	Slope	10 - 20 deg	0.995648	0.00399475
		20-25 deg	1.65373	1.41371e-06
		25 - 40 deg	1.81176	7.4217e-08
		40 - 65 deg	1.98375	4.22819e-07
		> 65 deg	-14.5735	0.986078
	Aspect	North	-0.686246	0.00446732
		East	0.353486	0.0309085
		Southeast	0.964395	1.34119e-09
		South	0.525931	0.00132496
		Southwest	-0.115641	0.510583
		West	-0.532506	0.00500257
		Northwest	-1.02078	1.77397e-06
Hpa-An, Myanmar	Intercept	Intercept	-20.9697	0.993904
	Land Cover Change	Forest to Agriculture	-13.9955	0.99018
		Agriculture to Urban	-13.7972	0.989694
		Agriculture to Forest	0.439066	0.308438
		Agriculture (no change)	-1.2301	0.0348222
	Distance to Road	20 - 50 m	0.605076	0.999837
		50 - 100 m	1.99809	0.999448
		100 - 200 m	17.1223	0.995023
		200 - 1000 m	14.9993	0.99564
		> 1000 m	17.4136	0.994938
	Soil Bulk Density	60 - 100 cg/cm3	-2.12979	0.000266281
		100-130 cg/cm3	-0.979069	0.0405814
	Forest Loss	forest loss = 1	0.346527	0.194502
	Slope	10 - 20 deg	3.09414	8.21373e-12
		20-25 deg	4.0698	4.81957e-19
		25 - 40 deg	4.64352	8.50919e-26
		40 - 65 deg	5.08262	7.50454e-24
		> 65 deg	-12.8906	0.993338
	Aspect	North	-2.15381	0.00698978
		East	0.833605	0.00967837
		Southeast	1.65526	1.47506e-07
		South	1.93428	4.91883e-09
		Southwest	0.911272	0.00635933
		West	-0.760764	0.0486198
		Northwest	-1.07108	0.0304018
Thaphabath, Laos	Intercept	Intercept	-19.5844	0.99472
	Land Cover Change	Forest to Agriculture	-1.51449	0.99969
		Agriculture to Forest	-16.0369	0.995068
		Agriculture (no change)	-1.57287	0.109319
	Distance to Road	20 - 50 m	1.35016	0.999723
		50 - 100 m	1.32536	0.999716
		100 - 200 m	1.52354	0.999851
		200 - 1000 m	1.11806	0.999737
		> 1000 m	14.6156	0.99606
	Soil Bulk Density	100-130 cg/cm3	1.42292	0.999831
	Forest Loss	forest loss = 1	0.518714	0.313847
	Slope	10 - 20 deg	3.00009	0.00464552
		20-25 deg	4.24261	8.30826e-05
		25 - 40 deg	5.27563	6.04954e-07
		40 - 65 deg	5.02256	3.8341e-05
		> 65 deg	-14.4592	0.996876
	Aspect	North	-2.45058	0.0420699
		East	1.31398	0.0401102
		Southeast	1.07069	0.106756
		South	0.490576	0.456592
		Southwest	1.83211	0.00417719
		West	1.15286	0.0836253
		Northwest	0.0502361	0.953975
Xieng Ngeun, Laos	Intercept	Intercept	-18.8058	0.983003
	Land Cover Change	Forest to Agriculture	-13.6542	0.974593
		Agriculture to Forest	-1.76073	0.032642
		Agriculture (no change)	-1.20544	0.00149951
	Distance to Road	> 1000 m	14.8791	0.986552
	Soil Bulk Density	100-130 cg/cm3	-0.47579	0.660038
	Forest Loss	forest loss = 1	0.311332	0.0373547
	Slope	10 - 20 deg	2.0715	0.00084485
		20-25 deg	2.34237	0.00015038
		25 - 40 deg	3.07103	4.70386e-07
		40 - 65 deg	2.85121	1.10874e-05
		> 65 deg	3.32674	0.0241086
	Aspect	North	-0.652851	0.134223
		East	1.46008	8.89721e-07
		Southeast	2.21598	6.30317e-15
		South	2.29529	6.06868e-16
		Southwest	2.1291	4.76576e-14
		West	1.64446	1.69522e-08
		Northwest	0.980702	0.00194027
